**Title:**

A qualitative examination into the support needs of people living with obesity during transition from tertiary obesity treatment

**Author names and affiliations:**

Ghada Alsultany<sup>a</sup>, Aymen El Masri<sup>b</sup>, Freya MacMillan<sup>b,c</sup>, Kathryn Williams<sup>d,e</sup>, Kate McBride<sup>a,c</sup>

<sup>a</sup> School of Medicine, Western Sydney University, Penrith, NSW, 2751, Australia

<sup>b</sup> School of Health Sciences, Western Sydney University, Penrith, NSW, 2751, Australia

<sup>c</sup> Translational Health Research Institute (THRI), Western Sydney University, Penrith, NSW, 2751, Australia

<sup>d</sup> Charles Perkins Centre–Nepean, Faculty of Medicine and Health, The University of Sydney, Kingswood, New South Wales, Australia

<sup>e</sup> Department of Endocrinology, Nepean Hospital, Nepean Blue Mountains Local Health District, Kingswood, New South Wales, Australia

**Corresponding author:**

Dr Kate McBride, [k.mcbride@westernsydney.edu.au](mailto:k.mcbride@westernsydney.edu.au)

**Declarations of interest:**

None to declare

## **Abstract**

**Background:** As the number of people living with obesity increases, the maintenance of treatment outcomes is especially pertinent. Treatment at tertiary obesity services have proven to be successful, but patients need to be transitioned out of these services to community-based care to accommodate the influx of new patients. Little is known about the support needs of patients after transition from acute tertiary obesity services. It is important to establish the supports needed by these patients, especially in the context of maintaining treatment outcomes and ensuring continuity of care.

**Methods:** A qualitative study was conducted to identify the support needs of people with obesity as they transition to community care. Patients and clinicians recruited from a tertiary obesity clinic participated in semi-structured interviews and focus groups to explore factors influencing transition and supports needed in the community. Data was collected through audio recordings, transcribed verbatim and analysed thematically.

**Results:** A total of 16 patients and 7 clinicians involved in the care of these patients participated between July 2020 and July 2021. Themes identified included the influence of clinic and individual factors on transition, the benefits of phased transition, patient-centred communication, and the role of social support. It was found that dependency and lack of self-efficacy, as well as low social support, hindered transition efforts. It was also identified that patients required substantial integrated professional and social support structures in the community to adequately address their care needs both during and following transition.

**Conclusion:** Interventions are needed to provide social community services following transition to ensure adequate community care that can support the maintenance of treatment outcomes. Such services should be integrated and address the social needs of people living with obesity.

**Keywords:** Obesity, Transition, Community care, Integrated care, General practitioners,

## 1. Introduction

Over 65% of adults and 25% of children in Australia are overweight or living with obesity and, as a result, live with a range of complications such as diabetes and cardiovascular disease[1]. The World Health Organization (WHO) classifies obesity as a chronic condition resulting from excessive fat accumulation increasing risks to physical and mental health, as well as heightening social and economic burdens on both individuals and communities[2]. For simplicity, obesity is measured as a body mass index (BMI) of  $\geq 30$  kg/m<sup>2</sup> or more.[1].

In Australia, severe cases of obesity are treated at tertiary level, often hospital-based, services, which have proven successful in achieving treatment outcomes, such as weight loss, improved metabolic parameters, and behavioural and psychological skill building[3]. Patients are often transitioned out of these services into community-based care following the acute phase of treatment, to accommodate the influx of new patients[4]. Transition out of hospital services is a crucial stage, as maintenance of treatment outcomes is required for sustainability of weight loss.

Adequate services are needed to support patients as they transition out of obesity services to community care, as acute clinic interventions are unlikely to have continued efficacy without long term community support due to the chronic and often lifelong nature of obesity[2, 4]. While primary care and allied health services exist, there may be issues in the integration of these services with tertiary care[3]. The care needs of people with obesity are often unique, requiring specialised equipment and discharge planning when transitioning from hospital to home[5]. As such, it is important to explore the supports and services needed during transition out of tertiary obesity clinics for people with obesity, as this phenomenon has not previously been sufficiently examined through qualitative techniques.

Patients' perspectives on their own care can bring important insights on how care should be delivered, ensuring client-centred services that appropriately address their needs[6]. In addition, exploring and comparing the perspectives of clinicians with patients can optimise and improve services, while addressing potential barriers to care[7].

As such, we aimed to explore the supports needed by patients during transition from a tertiary obesity clinic in an Australian healthcare setting through a qualitative exploration of the perspectives of both patients and clinicians.

## 2. Methods

Exploring patients and clinicians perspectives was achieved through a qualitative study employing semi-structured interviews and focus groups, described in accordance with the consolidated criteria for reporting qualitative studies (COREQ) checklist[8]. Ethics approval was granted by the Nepean Blue Mountains Human Research Ethics Committee 2019/ETH13681.

### 2.1. Participant recruitment

Purposive sampling was used to recruit participants. Participants were recruited from a public tertiary level hospital-based obesity service based in a local health district in Greater Western Sydney. The area within which the service is located has the highest rate of obesity (66.9%) across all metropolitan Primary Health Networks (PHNs) in Australia[1]. Current or previous adult patients, and clinicians involved in their care, were invited to participate in the study. Patients were recruited through flyers and referrals from clinic staff and their peers, while clinicians were contacted by a

researcher via email and invited to participate in one of two focus groups. Informed consent was obtained in writing or online, depending on the mode of referral and participant preferences.

## **2.2. Data collection**

Participants were contacted by phone or email to schedule interviews and focus groups which were conducted through an online platform (Zoom), by phone, or face-to-face either at the service or a convenient location. Data were collected using semi-structured focus groups and one-on-one interviews between December 2020 and July 2021. The interview guide was developed based on existing literature, research experience, and expert contribution. Questions focused on identifying existing support and further support needed from professional and social networks during transition.

Interviews lasted between 30 – 60 minutes and were recorded using a digital voice recorder before being transcribed verbatim using secure third-party services, with all identifying information removed from the transcripts. Only researchers and participants were present during data collection. No repeat interviews were conducted, and transcripts were not returned to participants. Data collection was ceased when data saturation was determined, as no new major themes arose from the data[9].

## **2.3. Data analysis**

Data was thematically analysed using an inductive approach, as outlined by Braun and Clarke[10]. De-identified transcripts were coded using the Quirkos program (Quirkos, Edinburgh, UK). Transcripts were checked for accuracy and re-read concurrent to code and theme generation to facilitate data familiarisation. Initial codes were generated inductively across the entire data set and initial themes were developed by finding patterns across these codes. Themes were reviewed and refined then defined and named in terms of the scope and focus of each theme, resulting in a narrative analysis reporting themes and data excerpts in tabular form. Participant identification numbers and pseudonyms were used to label excerpts. The coding framework was independently established by GA and KM then compared, discussed, and 25% of the total data were member checked by KW and AE to promote trustworthiness of the data interpretation.

## **2.4. Research team/reflexivity**

The research team consisted of active University faculty members, clinicians and a research student. All have had experience or training in qualitative research methods. Participants were interviewed by KM and GA. No previous relationship existed between researchers and participants and participants were made aware of the credentials of the interviewers and motivations for the research. The research team were aware of assumptions and biases they may have had and addressed these through group discussion of results to promote reflexivity.

## **3. Results**

A total of twenty-three patients and seven clinicians were contacted. Seven patients did not participate due to inability to make contact, leaving sixteen patients (13 female) and seven clinicians who were interviewed and included in this study.

*Table 1*

Thematic analysis resulted in three main categories being identified; service-related factors influencing transition, individual-related factors influencing transition, and bridging the gap to facilitate transition.

### **3.1. Service-related factors influencing transition**

Service-related factors influencing transition included the role of the clinic and how staff facilitated transition. This involved organisation of the transition process, influence of both positive and negative clinic communication, as well as patients feeling cared for. Clinic resources and services also influenced transition, though constraints of funding hindered their provision (Table 2).

*Table 2 here*

### **3.2. Individual-related factors influencing transition**

Self-efficacy and self-promotion were individual-related factors which significantly influenced transition, with patients able to address their own support needs resulting in more successful transitions. Conversely, dependency on the clinic and its services, the presence of multiple comorbidities, as well as social issues and barriers, such as mental health problems and life-long weight issues, were likely to negatively impact the transition experience (Table 3).

*Table 3 here*

### **3.3. Bridging the gap to facilitate transition**

Several factors were identified as being necessary to bridge the gap to facilitate successful transition out of the clinic. This included the need for transitional and ongoing integrated community care, through the provision of professional supports and services, such as general practitioners, allied health, and social services. Community support structures, including peer support groups were also identified as a need. These support groups were deemed as being particularly important as patients were frequently socially isolated. Several guiding principles underpinning how these groups could be successful were identified (Box 1). Additionally, during COVID-19 lockdowns, telehealth and online support were the only means to consult with patients. This allowed both the clinic and its patients to identify this as a component that could also facilitate transition (Table 4).

*Table 4 here*

*Box 1 Guiding principles*

## **4. Discussion**

Our results indicate that transition experiences vary considerably between participants who have attended a tertiary obesity service. While this appears to be a consequence of both individual characteristics and systemic factors such as transition process/policies, there is potential to facilitate a more congruent experience. This may be achieved by addressing factors such as patient dependency and self-efficacy, patient-provider communication, and transition processes. It was also apparent that the support needs of people living with obesity were only partly addressed during and

following transition to community care. This is evident in the need for additional, integrated support from social and health networks that were identified by both the clinicians and patients in our study. Additionally, both patients and clinicians highlighted the difficulties in organising and coordinating these supports, suggesting a need for greater integration of services.

Dependency on the service and its clinicians was highly apparent. Level of dependency differed significantly between patients, and appeared to coincide with lower self-efficacy, with many patients lacking confidence to independently manage their own weight. These findings are consistent with a qualitative study of the follow up support of a weight management program for patients with obesity in the United Kingdom[11]. This study found an over-dependence on healthcare professionals hindered independent weight management, as patients deflected the responsibility of management to more authoritative figures, such as health professionals[11]. Lack of self-efficacy may be the driving force behind this dependence, suggesting some patients may need supports to boost their self-efficacy as an integral part of their transition process. Additionally, a sub-group of our patients tended to seek codependent relationships. This was apparent in our study among patients who expressed frustration and resentment for being dependent on family members, and for not being looked after enough by clinicians. While the evidence for this is limited, some studies have suggested that families with obesity display similar codependent characteristics to those seen among addiction conditions[12]. Such persons may also gravitate toward codependency with their clinicians, who can take on the role of 'healer' or problem solver while the patient takes on the role of passive recipient, with neither benefitting, as self-efficacy remains low. Resentment is also likely to ensue when patient problems are not 'fixed'[13]. As such, patients are likely to benefit from access to greater support networks that may reduce reliance on professionals.

Codependency should be identified and treated in the context of low self-efficacy and self-esteem, anxiety, depression, lack of motivation, and isolation, which tend to cluster in both persons with codependence and obesity[14]. A primary aim of this strategy should be to increase self-efficacy. Family treatment may also be warranted in such a scenario, as it has been shown to be effective for mitigating codependence with other conditions, such as alcoholism and drug dependency[15, 16]. Further, clinicians may need to be more aware of their own propensity to enter codependent relationships with patients, hindering development of self-efficacy, while also causing burnout to themselves.

Patient-reported provider communication also influenced how patients felt about their transition. Patients who described a negative transition experience expressed lower satisfaction with provider communication, receiving limited information regarding transition and discharge, and limited opportunities for collaborative/patient-centred care. The opposite was true for those who reported positive experiences. These findings highlight the importance of clear communication between clinicians and patients regarding goals and expectations of treatment and discharge. The variation in patient experience suggests a need to identify dissatisfied patients early and to intervene to resolve communication issues to promote positive transition experiences. Patient-provider communication is crucial to patient satisfaction, and interventions to improve this have reported improved health outcomes, including reduced readmission in hospital settings[17]. It is important to note, however, that internalised weight bias is more strongly associated with perceived clinician bias than experienced weight stigma, which may account for the differences in communication reported by our patients, which ranged from 'judged' to 'empowered'[18]. Patient dissatisfaction was more prevalent among those who were 'resistant' to transition, as such it may be beneficial to identify patients' readiness for discharge/transition through standardised tools. This may be achieved

through the use of decision aids and categorisation of patients to aid clinicians in identifying patients in need of additional intervention and referral to community care and support networks. While discharge readiness tools and decision aids are widely used in other care settings, there is limited evidence for their use in tertiary obesity treatment.

Our results strongly indicate the potential positive impact of peer support groups to facilitate transition. Many of the patients in our study described being socially isolated, a finding reiterated by clinicians. Social isolation can exacerbate mental health conditions, such as anxiety and depression, and reinforce internalised stigma[19]. This is bi-directional, as mental health conditions and stigmatisation can lead to greater social isolation[19]. The combination of these factors can lead to poorer health outcomes, especially during transitory phases of treatment. There is a potential for peer support groups to partly address these issues through social participation and networking in a supportive community environment. These groups have been recommended as being useful for mental health and chronic conditions, as increasing support networks are beneficial for mental health and can support health management behaviours[20]. Although efficacy of peer support groups varies between studies, support groups may be beneficial in weight loss and maintenance, especially as they foster a sense of community between participants[21]. While little is known regarding the usefulness of peer support groups to facilitate transition to community care, peer support currently forms part of transitional discharge models for transition from psychiatric hospitals to community, which have shown to be cost effective and result in lower readmission rates[22].

Additionally, peer support groups may help patients cope with stigma. The patients who took part in our study and their clinicians reported patients being more confident in participating in public activities, such as outdoor recreation, when in a group setting with their peers. Research suggests that support groups manage stigma by allowing persons to connect with a larger social support network, providing safe and non-judgemental environments, and allow for coping with confronting situations as a group, though these have not been evaluated in relation to obesity[23].

The structure and operation of peer support groups that the patients in our study were already part of varied considerably, making evaluation of effectiveness in this context difficult. As some groups were more successful than others, we asked patients and their clinicians to identify elements that may lead to more successful groups. These included the need for experienced/trained facilitators, while keeping groups less formal with the use of lay peer support workers rather than clinicians. Access to funding and resources to promote sustainability was also seen to be important, as well as ongoing training support for facilitators and collaboration with groups members on group structure and content, so as to mitigate the spread of misinformation and over reliance on group facilitators. These suggestions have been reported elsewhere, where facilitator training and experience have both been found to be vital to success of groups[24].

Barriers reported by patients to attending groups include depression, social anxiety, and stigma, while clinicians identified stigma as the primary barrier to attendance, especially in younger patients. It has been documented that mental health conditions and stigma negatively impact social participation and this correlates with findings that obesity related reduction in social participation is more common in younger individuals and appears to decline with age[25]. While stigma has not been explicitly reported as a barrier to support group attendance, research suggests that people with obesity hold strong explicit and implicit anti-fat attitudes and hence may not want to associate with others with obesity[26]. Clinicians in our study suggested that patients should be eased into groups through processes such as bringing a buddy to their first meeting, though little evidence exists for methods to address participation impacted by stigma. Further research is needed to explore methods to increase participation in groups impacted by stigma.

Telehealth may also be a potential 'outreach' support for patients as they transition out of the clinic. Telehealth was utilised by patients and clinicians due to lockdowns during the COVID-19 pandemic. Most patients found telehealth to be a convenient way of connecting with clinicians, especially as it addressed barriers such as transportation and time constraints. Literature suggests telehealth as an effective mode of health management for patients, especially in providing aftercare, though limitations to its use need to be addressed[27, 28]. These include access to adequate internet and related equipment, such as microphone and/or webcam, and telecommunication devices, and digital literacy[28]. There is potential for the application of telehealth in transitioning patients out of tertiary services to community care, by allowing for longer follow-up periods while maintaining clinic efficiency, which is especially useful for more complex patients[27]. Telehealth also has the potential to be part of an integrated care framework, by facilitating transition to community care as well as communication and training between tertiary and primary healthcare practitioners[29].

The New South Wales integrated care strategy aims to relieve the burden from individuals in accessing care through the integration and coordination of services that enable seamless transitions of care, especially between tertiary/secondary services and community care[30]. Our findings indicate pressure on patients and clinicians to establish and access care networks in the community, leading to a lack of adequate integration. Both patients and clinicians reported that following transition to the community, patients continued to require dietary, mental health, and physiotherapy support, but some had difficulties in setting these up. Clinicians also identified that handover to general practitioners (GPs) were difficult, as not all patients had regular GPs and not all GP practices could provide adequate support to patients. These findings are concurrent with research indicating GPs are best situated to provide long term community care for people with obesity but require additional training, support, and role clarification to achieve this[31-33]. This is particularly important, as it has been identified that GPs are ill equipped to manage obesity with the current level of training and tools at their disposal. However, interventions to increase GP confidence and self-efficacy can mitigate this[34, 35]. Additionally, this training should address the weight bias of GPs, which is extensively reported in the literature and deters patients from seeking their care[34]. Patients should also ideally be able to access multidisciplinary teams through primary care, which would help address their needs post-transition, though the lack of recognition of obesity as a chronic disease in Australia and associated lack of funding limits this option[2]. Considering the pressure on public health services to cope with rising obesity rates, integrated care networks may relieve some of this burden by addressing fragmented care, often leading to poorer outcomes and greater costs[3, 4].

The patients also identified a need for home care, transportation services in the community, and specialised equipment, a finding reported when transitioning people with obesity from hospital to home[36]. Clinicians also reported that patients often required disability support for physical and mental conditions but had difficulties in access and that patients were unlikely to find equipment tailored for them outside of the clinic. This is in accordance with current literature which shows that the cooccurrence of obesity and disability is increasing[37]. In addition to this, extreme obesity on its own impacts functionality and patients often need assistance with activities of daily living (ADLs), as well as specialised equipment such as bariatric chairs and pressure reduction mattresses, which many be costly if not reimbursed[36]. These findings suggest a need for the examination of the potential for broader social service support for people with obesity. Extreme obesity is not recognised as a disabling condition and is not eligible for the Australian National Disability Insurance Scheme (NDIS), which provides information, reimbursement, and connections to community service for people with disability[38]. As such, patients require alternate processes to address their social service support needs, due to this lack of recognition.



Additionally, patients in this study reported they did not have access to weighing scales that could accommodate their weight outside of the clinic. This negatively impacted their ability to monitor their weight in a home/community setting. Studies on access to weighing scales are limited, though it has been reported that most commercial scales have a maximum weight of 150-180 kgs, and that scales with maximum weight above this range were more costly and less common[39]. As weight monitoring can be beneficial to weight management, patients are disadvantaged in this regard due to reduced access to weighing scales[39]. Lack of access to weighing scales, and social service support needs including specialised equipment, may require the integration and establishment of additional support networks which can be managed/addressed through social work and care coordination as well as from services such as the NDIS, through recognition of the impacts of obesity regarding disability.

The social service support needs of people with obesity may be addressed through social work and care coordination, which are vital to receiving integrated care as they address the community support needs of patients. The role of social work in obesity is becoming more apparent. It has been recently argued that obesity is increasingly recognised as a social justice issue, due to social determinants and weight discrimination associated with obesity, and hence a need for social work intervention[40]. Consequently, it is within the scope of social work practice to mobilise services and supports to address socioeconomic and psychosocial needs of people with obesity[40]. Care coordination also plays a significant role, as care coordinators can assist in navigating healthcare systems through support, information, and connections to other services, which can be beneficial for patients with obesity, due to their complex needs. A review of systematic reviews on care coordination interventions found improved health outcomes in a range of conditions including glycaemic control in patients with diabetes, service continuity in patients with mental illness (e.g., including lower depression severity and improved adherence), reduced hospital readmissions, and improved mortality in patients with heart failure and stroke[41]. Further research is needed on the potential for care coordination for people with obesity in tertiary health services, especially as it may address reliance on these services and serve as a bridge to facilitate integration with community services.

Our study was limited by the lack of heterogeneity of the sample, as most participants were female and above the age of 45, though this reflects the demographics of patients attending the service. Additionally, while our results may be transferable to other settings, they are not generalisable. However, this is not the purpose of qualitative research, which rather aims to deeply explore a particular topic to identify the important areas requiring future interrogation.

## **5. Conclusion**

We aimed to explore the support needs of people living with obesity in an Australian healthcare setting as they transition from tertiary to community care through a qualitative exploration of the perceptions of patients and the clinicians involved in their care. It was found that service and individual factors, such as perceived provider communication and patient dependency, respectively, significantly influence transition experience. Additionally, patients require integration and enhancement of community support service and structure to address their transition needs. Future research should aim to address social community service needs following transition to ensure adequate community care that can support the maintenance of treatment outcomes.

## **6. References**

1. Health Ato, Welfare. A picture of overweight and obesity in Australia: Canberra; 2017.
2. Opie CA, Haines HM, Ervin KE, Glenister K, Pierce D. Why Australia needs to define obesity as a chronic condition. *BMC Public Health*. 2017;17(1):500.
3. Osmundsen TC, Dahl U, Kulseng B. Enhancing knowledge and coordination in obesity treatment: a case study of an innovative educational program. *BMC Health Services Research*. 2019;19(1):278.
4. Services NAoCO. National Framework for Clinical Obesity Services. 2020.
5. Miles J, Anderson DP, Engelke M, Kirkpatrick MK, Pories ML, Waters WG, et al. Barriers to transition of obese patients from hospital to community. *The American journal of managed care*. 2012;18(6):e234-7.
6. Bombard Y, Baker GR, Orlando E, Fancott C, Bhatia P, Casalino S, et al. Engaging patients to improve quality of care: a systematic review. *Implementation Science*. 2018;13(1):98.
7. Pinto RM, Spector AY, Rahman R. Nurturing Practitioner-Researcher Partnerships to Improve Adoption and Delivery of Research-Based Social and Public Health Services Worldwide. *Int J Environ Res Public Health*. 2019;16(5):862.
8. Tong A, Sainsbury P, Craig J. Consolidated criteria for reporting qualitative research (COREQ): a 32-item checklist for interviews and focus groups. *International Journal for Quality in Health Care*. 2007;19(6):349-57.
9. Braun V, Clarke V. To saturate or not to saturate? Questioning data saturation as a useful concept for thematic analysis and sample-size rationales. *Qualitative Research in Sport, Exercise and Health*. 2021;13(2):201-16.
10. Braun V, Clarke V. Using thematic analysis in psychology. *Qualitative Research in Psychology*. 2006;3(2):77-101.
11. Webb R, Davies I, Johnson B, Abayomi J. A qualitative evaluation of an NHS Weight Management Programme for obese patients in Liverpool. *Nutrition and Food Science*. 2014;44(2):144-55.
12. Kazemi Rezaei SA, Khoshsorour S, Nouri R. The Discriminative Role of Metacognitive Beliefs, Difficulty in Emotion Regulation, and Codependency in Obese Women. *HBI\_Journals*. 2019;22(4):86-97.
13. Salmon P, Young B. Dependence and caring in clinical communication: the relevance of attachment and other theories. *Patient Educ Couns*. 2009;74(3):331-8.
14. Bynum D, Boss BJ, Schoenhofer S, Martsolf D. The Development and Testing of the Codependency-Overeating Model in Undergraduate Social Science Students in a Mississippi College. *SAGE Open*. 2012;2(4):2158244012465763.
15. Abadi FKA, Vand MM, Aghaee H. Models and interventions of codependency treatment, systematic review. *Journal UMP Social Sciences and Technology Management*. 2015;3(2).
16. Leichter SB. Making outpatient care of diabetes more efficient: analyzing noncompliance. *Clinical Diabetes*. 2005;23(4):187-90.
17. Hachem F, Canar J, Fullam MA F, Gallan PhD AS, Hohmann S, Johnson C. The relationships between HCAHPS communication and discharge satisfaction items and hospital readmissions. *Patient Experience Journal*. 2014;1(2):71-7.
18. Puhl R, Lessard L, Himmelstein M, Foster G. The roles of experienced and internalized weight stigma in healthcare experiences: Perspectives of adults engaged in weight management across six countries. *PLOS ONE*. 2021;16:e0251566.
19. Taylor VH, Forhan M, Vigod SN, McIntyre RS, Morrison KM. The impact of obesity on quality of life. *Best Practice & Research Clinical Endocrinology & Metabolism*. 2013;27(2):139-46.
20. Shalaby RAH, Agyapong VI. Peer support in mental health: literature review. *JMIR Mental Health*. 2020;7(6):e15572.
21. Yanya C, Zekai L, Qiaohong Y, Shuai Y, Chunxia D, Tieling Z, et al. The Effect of Peer Support on Individuals with Overweight and Obesity: A Meta-Analysis. *Iranian Journal of Public Health*. 2021;50(12).

22. Forchuk C, Reynolds W, Sharkey S, Martin M-L, Jensen E. Transitional Discharge Based on Therapeutic Relationships: State of the Art. *Archives of Psychiatric Nursing*. 2007;21(2):80-6.
23. Puhl R, Brownell KD. Ways of coping with obesity stigma: review and conceptual analysis. *Eating Behaviors*. 2003;4(1):53-78.
24. Pienaar M, Reid M. Self-management in face-to-face peer support for adults with type 2 diabetes living in low- or middle-income countries: a systematic review. *BMC Public Health*. 2020;20(1):1834.
25. Zettel-Watson L, Britton M. The impact of obesity on the social participation of older adults. *The Journal of general psychology*. 2008;135(4):409-24.
26. Gumble A, Carels R. The harmful and beneficial impacts of weight bias on well-being: The moderating influence of weight status. *Body Image*. 2012;9(1):101-7.
27. Perri MG, Shankar MN, Daniels MJ, Durning PE, Ross KM, Limacher MC, et al. Effect of telehealth extended care for maintenance of weight loss in rural US communities: a randomized clinical trial. *JAMA network open*. 2020;3(6):e206764-e.
28. Vasselli JR, Juray S, Trasino SE. Success and failures of telehealth during COVID-19 should inform digital applications to combat obesity. *Obesity Science & Practice*. n/a(n/a).
29. Seppänen M, Hämäläinen T, Joffe G, Mäkitie L. eConsultation between health care professionals in primary health care and specialized medical care. *European Journal of Public Health*. 2020;30(Supplement\_5):ckaa165. 224.
30. Lattimore J, Sherborne-Higgins S, Miller E, Dunstore Z. The New South Wales Integrated Care Strategy. *International Journal of Integrated Care*. 2021;20(3).
31. Saint-Pierre C, Herskovic V, Sepúlveda M. Multidisciplinary collaboration in primary care: a systematic review. *Family Practice*. 2017;35(2):132-41.
32. Jose K, Venn A, Nelson M, Howes F, Wilkinson S, Ezzy D. A qualitative study of the role of Australian general practitioners in the surgical management of obesity. *Clinical Obesity*. 2017;7(4):231-8.
33. Sturgiss EA, Elmitt N, Haelser E, van Weel C, Douglas KA. Role of the family doctor in the management of adults with obesity: a scoping review. *BMJ Open*. 2018;8(2):e019367.
34. Dietz WH, Baur LA, Hall K, Puhl RM, Taveras EM, Uauy R, et al. Management of obesity: improvement of health-care training and systems for prevention and care. *The Lancet*. 2015;385(9986):2521-33.
35. Sturgiss E, Haesler E, Elmitt N, Chris van W, Douglas K. Increasing general practitioners' confidence and self-efficacy in managing obesity: a mixed methods study. *BMJ Open*. 2017;7(1).
36. Brzezinski S. Morbid obesity: issues and challenges in home health. *Home Healthcare Now*. 2008;26(5):290-7.
37. Keramat SA, Alam K, Sathi NJ, Gow J, Biddle SJ, Al-Hanawi MK. Self-reported disability and its association with obesity and physical activity in Australian adults: Results from a longitudinal study. *SSM-Population Health*. 2021;14:100765.
38. McIlwraith J, Madden B. NDIS-a clearer picture? *Precedent (Sydney, NSW)*. 2018(149):20-5.
39. Park JS, Bramante C, Vakil R, Lee G, Gudzone K. Affordability and features of home scales for self-weighing. *Clinical Obesity*. 2021;11(5):e12475.
40. Sullivan P, Kincaid Z. Obesity as a chronic care challenge: new opportunities for social work practice. *Social Work in Health Care*. 2020;59(7):470-84.
41. McDonald KM, Sundaram V, Bravata DM, Lewis R, Lin N, Kraft SA, et al. Review of Systematic Reviews of Care Coordination Interventions. *Closing the Quality Gap: A Critical Analysis of Quality Improvement Strategies (Vol 7: Care Coordination)*: Agency for Healthcare Research and Quality (US); 2007.

**Table 1: Demographic data for participants**

| Patient characteristics | Mean (range)/count (%) |
|-------------------------|------------------------|
|-------------------------|------------------------|

|                                     |            |
|-------------------------------------|------------|
| <b>Age</b>                          | 51 (35-65) |
| <b>Gender</b>                       |            |
| <b>Female</b>                       | 13 (81%)   |
| <b>Male</b>                         | 3 (19%)    |
| <b>Clinic patient</b>               |            |
| <b>Current</b>                      | 9 (56%)    |
| <b>Past</b>                         | 7 (44%)    |
| <b>Part of social support group</b> |            |
| <b>Yes</b>                          | 8 (50%)    |
| <b>No</b>                           | 8 (50%)    |
|                                     |            |
| <b>Clinician characteristics</b>    |            |
| <b>Gender</b>                       |            |
| <b>Female</b>                       | 6 (86%)    |
| <b>Male</b>                         | 1 (14%)    |
| <b>Role</b>                         |            |
| <b>Clinical Psychologist</b>        | 2          |
| <b>Dietician</b>                    | 3          |
| <b>Endocrinologist</b>              | 1          |
| <b>Physiotherapist</b>              | 1          |

**Table 2**

| <b>Service-related factors influencing transition</b>                                                                                                                                                                                                                                                                                                                                                                                                                                                                                                                                                                                                                                                                                                                                                                                                                                                                                                                                                                                                                            |                                                                                                                                                                                                                                                                                                                                                                                                                                                                                                                                                                                                                                                                                                                                                                                                                                                                                                                 |
|----------------------------------------------------------------------------------------------------------------------------------------------------------------------------------------------------------------------------------------------------------------------------------------------------------------------------------------------------------------------------------------------------------------------------------------------------------------------------------------------------------------------------------------------------------------------------------------------------------------------------------------------------------------------------------------------------------------------------------------------------------------------------------------------------------------------------------------------------------------------------------------------------------------------------------------------------------------------------------------------------------------------------------------------------------------------------------|-----------------------------------------------------------------------------------------------------------------------------------------------------------------------------------------------------------------------------------------------------------------------------------------------------------------------------------------------------------------------------------------------------------------------------------------------------------------------------------------------------------------------------------------------------------------------------------------------------------------------------------------------------------------------------------------------------------------------------------------------------------------------------------------------------------------------------------------------------------------------------------------------------------------|
| <b>Sub-themes</b>                                                                                                                                                                                                                                                                                                                                                                                                                                                                                                                                                                                                                                                                                                                                                                                                                                                                                                                                                                                                                                                                | <b>Excerpt</b>                                                                                                                                                                                                                                                                                                                                                                                                                                                                                                                                                                                                                                                                                                                                                                                                                                                                                                  |
| <p><b>The role of the clinic and its staff</b><br/>                     Patients described the role of the clinic in providing care significantly influenced their transition experience. Receiving care that felt integrated through connection to internal providers aware of their medical history, and referrals to external practitioners provided participants with the feeling that they were being cared for, listened to and not overlooked. Having a ‘good’ connection with the clinic staff helped patients feel looked after and understood. This facilitated more effective communication of concerns and allowed patients to feel positive and supported during transition. Additionally, patients who expected transition and were aware of the transition process, reported a more positive experience, as they felt involved in the decision to transition out, and were prepared to move on without the clinic. Other patients felt limited due to perceived negative communication from clinic staff, which hindered patients’ ability to ‘keep on track’</p> | <p>“We want you to see that specialist...let us know what other medications you’re on and they actually just listened. And then they put a plan in place to help me as well” P17 Tess</p> <p>“So I do trust that one more particularly. And I’ve always got on quite well with the dietitian. So yes. Just you know gelled” P17 Tess</p> <p>“I feel really empowered. I feel positive. The people there are trained to deal with – they understand our issues, and you feel in a good headspace when you go there” P3 Barry</p> <p>“And we both agreed to end it. It wasn’t just them telling me well you no longer sort of welcome here. So it was it was, you know, an agreeable sort of ending” P23 Mel</p> <p>“They didn’t really put me down, but they said, oh, you’ve only lost that much weight... and that really put me in a bumzone, and I actually put on a kilo after that visit so” P16 Jules</p> |

|                                                                                                                                                                                                                                                                                                                                                                                                                                                                                                                                                                                                                                                                                                                                                                                                                                                                                                                                                                                                                               |                                                                                                                                                                                                                                                                                                                                                                                                                                                                                                                                                                                                                                                                                                                                                                                                                                                                                                                                                                                                                                                                                                                                                                                                                                                                                                                                                                                       |
|-------------------------------------------------------------------------------------------------------------------------------------------------------------------------------------------------------------------------------------------------------------------------------------------------------------------------------------------------------------------------------------------------------------------------------------------------------------------------------------------------------------------------------------------------------------------------------------------------------------------------------------------------------------------------------------------------------------------------------------------------------------------------------------------------------------------------------------------------------------------------------------------------------------------------------------------------------------------------------------------------------------------------------|---------------------------------------------------------------------------------------------------------------------------------------------------------------------------------------------------------------------------------------------------------------------------------------------------------------------------------------------------------------------------------------------------------------------------------------------------------------------------------------------------------------------------------------------------------------------------------------------------------------------------------------------------------------------------------------------------------------------------------------------------------------------------------------------------------------------------------------------------------------------------------------------------------------------------------------------------------------------------------------------------------------------------------------------------------------------------------------------------------------------------------------------------------------------------------------------------------------------------------------------------------------------------------------------------------------------------------------------------------------------------------------|
| <p>during transition. Further, when transition was seen as abrupt, or in some cases was unexpected with little transition process, patients reported a very negative transition experience. These experiences led to unsuccessful transition as patients did not feel prepared.</p>                                                                                                                                                                                                                                                                                                                                                                                                                                                                                                                                                                                                                                                                                                                                           |                                                                                                                                                                                                                                                                                                                                                                                                                                                                                                                                                                                                                                                                                                                                                                                                                                                                                                                                                                                                                                                                                                                                                                                                                                                                                                                                                                                       |
| <p>These mixed experiences are supported by the clinicians, who noted that mixed messaging around transition from different clinicians could occur, resulting in confusion and negative impacts on transition. Clinicians described their primary objectives during transition as Promoting self-efficacy, achieving a balance between engaging patients while promoting independence, and assessing readiness for transition. Clinicians also emphasised the benefits of a well-planned and phased transition, by informing patients early to expect an 'end' along with regular reminders about transition. Clinicians agreed an abrupt transition can leave patients unsupported, though reported this usually occurred when patients no longer attended and were subsequently lost to follow-up due to personal circumstances. Additionally, clinicians said some patients continued to rely on the clinic, despite being transitioned out, indicating resistance to transition despite a planned and phased process.</p> | <p>"But when you have multiple clinicians and you're all delivering a slightly different message, depending on how you interact with the clients, that can be a bit confusing" C1 Mike FG1</p> <p>"what we actually do in the process is guided problem solving, actually looking at what processes are, assisting them to actually make decisions...we encourage self efficacy" C2 Pat FG1</p> <p>"I don't want them to feel that this is the only place that they can feel comfortable exercising...same message across, like I take the approach of. You know, trying to engage them, but not allowing them... to try to draw boundaries that they are not trying to me for everything" C1 Mike FG1</p> <p>"Thats the one technique to transition a bit slower and then we can cut ties, you know, once they're feeling a bit more secure" C7 Pip FG2</p> <p>"I'm constantly reminding them every session that now's the time to start thinking about where you're moving to so that you can continue this as soon as this group finishes" C1 Mike FG1</p> <p>"And I find that the transition phase out of this is very abrupt. Like life happens and they either move somewhere or they're gone to their study situations changed or they've got a job now and they just sort of disappear. And I suppose in terms of their support, then it's not really much..." C4 Sam FG1</p> |
| <p><b>Clinic resources and services</b><br/>When asked about what they needed to help them transition out of the clinic, patients felt having resources to keep them informed</p>                                                                                                                                                                                                                                                                                                                                                                                                                                                                                                                                                                                                                                                                                                                                                                                                                                             | <p>"I mean, the positives were I mean, you got a lot of useful information and practical advice, so" P20 Dom</p>                                                                                                                                                                                                                                                                                                                                                                                                                                                                                                                                                                                                                                                                                                                                                                                                                                                                                                                                                                                                                                                                                                                                                                                                                                                                      |

|                                                                                                                                                                                                                                                                                                                                                                                                                                                                                                                                                                                                                                                                                                                                                                                                          |                                                                                                                                                                                                                                                                                                                                                                                                                                                                                                                                                                                                                                                                                                         |
|----------------------------------------------------------------------------------------------------------------------------------------------------------------------------------------------------------------------------------------------------------------------------------------------------------------------------------------------------------------------------------------------------------------------------------------------------------------------------------------------------------------------------------------------------------------------------------------------------------------------------------------------------------------------------------------------------------------------------------------------------------------------------------------------------------|---------------------------------------------------------------------------------------------------------------------------------------------------------------------------------------------------------------------------------------------------------------------------------------------------------------------------------------------------------------------------------------------------------------------------------------------------------------------------------------------------------------------------------------------------------------------------------------------------------------------------------------------------------------------------------------------------------|
| <p>helped better prepare them, especially when information was clear and readily available. Information included general advice on diet and lifestyle as well as quick reference guides for recipes and exercise, which facilitated greater satisfaction with the clinic. Having access to multiple services in the clinic, including psychologists and support groups, along with referral to services outside the clinic, were also felt to assist the transition process. Other patients, however, perceived a lack of resources to meet demand, including funding issues impacting on staffing, impacting service delivery quality.</p>                                                                                                                                                              | <p>“you have clinicians who have a good understanding, like for example, people working at Nepean Metabolic Clinic, those people. Like when I go to that clinic, I feel really empowered” P3 Barry</p> <p>“I know they’re flat chat at the clinic, so they most probably wouldn’t have time to sit and talk to someone once a week” P9 Evie</p>                                                                                                                                                                                                                                                                                                                                                         |
| <p>Clinicians identified provision of a safe environment with equipment, such as bariatric chairs and weighing scales, as well as information and referral to services, as tools patients can access in the clinic as they transition. Clinicians also acknowledged that clinic capabilities were restricted due to limited capacity, chronic wait list times, and insufficient funding, making some services (such as one-on-one consults) unsustainable in the longer term. Clinicians also felt provision of integrated clinic and community services required additional staffing and funding support. Funding for social work and case coordination were seen as particularly pertinent given these services’ value when providing integrated support to patients within and beyond the clinic.</p> | <p>“like we have here, like bariatric chairs. People need to know that the place is adequate for them to be safe in” C5 Kel FG2</p> <p>“initially people seen one to one by all members of the team and then thinking, obviously, we have a huge wait list and thinking we can't sustain this. There's not enough staff to sustain regular appointments with everybody. And then also thinking there's benefits to groups. So that's why we brought in the the ‘Be well’ program” C3 Ron FG1</p> <p>“Physio department who have been struggling with the chronic waitlist list for years” C1 Mike FG1</p> <p>“But I think if you've got somebody like a case manager or A social worker” C6 Cas FG2</p> |

**Table 3**

| <b>Individual related factors influencing transition</b>                                                                                                                                                                                                                                                                                                                                                                                                                                                                                                                                             |                                                                                                                                                                                                                                                                                                                                                                                                                                                                                                    |
|------------------------------------------------------------------------------------------------------------------------------------------------------------------------------------------------------------------------------------------------------------------------------------------------------------------------------------------------------------------------------------------------------------------------------------------------------------------------------------------------------------------------------------------------------------------------------------------------------|----------------------------------------------------------------------------------------------------------------------------------------------------------------------------------------------------------------------------------------------------------------------------------------------------------------------------------------------------------------------------------------------------------------------------------------------------------------------------------------------------|
| <b>Sub-themes</b>                                                                                                                                                                                                                                                                                                                                                                                                                                                                                                                                                                                    | <b>Excerpt</b>                                                                                                                                                                                                                                                                                                                                                                                                                                                                                     |
| <p><b>Self-efficacy and self-promotion</b><br/>Self-efficacy, motivation, and mindset were apparent in influencing transition experience. Patients who had a positive transition experience or were in the process of preparing their transition reported greater self-efficacy. This was observed in the language patients used to describe how they were supported through learning, self-motivation and setting up their own support networks. Patients also identified the importance of motivation and receiving encouragement in continuing to progress beyond the clinic. This motivation</p> | <p>“I don’t know if I need any support [from the clinic] at this point...I think, for me, I've done a lot of reading and trying to understand how my body reacts with different foods” P16 Jules</p> <p>“I did not take the surgery, because I thought no. After the surgery I have to follow that lifestyle. If I can do it after the surgery, why can’t I do it now?” P9 Fran</p> <p>“But I know it's their encouragement has sort of taught me how to do how to know what's right” P23 Tess</p> |

|                                                                                                                                                                                                                                                                                                                                                                                                                                                                                                                                                                                                                                                                                                                                                                                                                                                                                                                                                                                                                                                                 |                                                                                                                                                                                                                                                                                                                                                                                                                                                                                                                                                                                                                                                                                                                                                                                                                          |
|-----------------------------------------------------------------------------------------------------------------------------------------------------------------------------------------------------------------------------------------------------------------------------------------------------------------------------------------------------------------------------------------------------------------------------------------------------------------------------------------------------------------------------------------------------------------------------------------------------------------------------------------------------------------------------------------------------------------------------------------------------------------------------------------------------------------------------------------------------------------------------------------------------------------------------------------------------------------------------------------------------------------------------------------------------------------|--------------------------------------------------------------------------------------------------------------------------------------------------------------------------------------------------------------------------------------------------------------------------------------------------------------------------------------------------------------------------------------------------------------------------------------------------------------------------------------------------------------------------------------------------------------------------------------------------------------------------------------------------------------------------------------------------------------------------------------------------------------------------------------------------------------------------|
| <p>could come from either themselves (health-conscious mindset) or from others (i.e., peers, clinicians or family).<br/>Not surprisingly, the converse created issues for other patients, who reported a lack of motivation hindered their transition, as it was difficult to maintain and continue progress, and achieve goals when feeling 'lazy'.</p>                                                                                                                                                                                                                                                                                                                                                                                                                                                                                                                                                                                                                                                                                                        | <p>"we all, not that we're health conscious because we broke the rules quite often, but we'd all be saying, oh, you know, maybe that's not a good choice. And, you know, if we do want a snack, well, then it's Hummus, then it's healthy, healthy dips and stuff. We try, even if we don't always get it right." P23 Tess</p> <p>"I always get these plan - you get these plans in your mind...then I just don't follow through with them. I procrastinate a lot" P2 Adrian</p>                                                                                                                                                                                                                                                                                                                                         |
| <p>Clinicians agreed that patients with greater self-efficacy and ability to problem solve were more likely to successfully transition, as they were able to address their own support needs by leveraging existing support to form support networks and identify how to manage their health issues. Clinicians felt patients with low self-efficacy had difficulty accessing support on their own, as well as motivating and supporting themselves when encountering difficulties.</p>                                                                                                                                                                                                                                                                                                                                                                                                                                                                                                                                                                         | <p>"focused on bringing in the supports into their world as they're transitioning out...So it's sort of wrapping the community around them to try and support them as they carry on" C2 Pat FG1</p> <p>"language that sounds reassuring, i.e. I realize what I need to do now, which is address all these other things." C7 Pip FG2</p> <p>"And here are some examples of networks that they can make, but that they physically needed to go out and. Yeah, hold their hand while they were doing that." C5 Kel FG2</p> <p>"more variable in terms of capacity to take stuff on or willingness to take stuff on so well that sort of individualized characteristic" C2 Pat FG1</p>                                                                                                                                       |
| <p><b>Dependency, comorbidities, and social issues</b><br/>Having a codependent relationship with the clinic was a significant barrier to transition. Several patients reported that they relied too heavily on the service and felt unable to make progress after they left. As a result, some patients felt unsupported by the clinic and did not like the reduced contact during transition, which resulted in dissatisfaction and negative perceptions of transition.<br/>Patients also reported that comorbid conditions and social issues often hindered a successful transition. Some patients said these factors impacted on their ability to maintain exercise, attend clinic appointments and participate in activities, leading to an inability to maintain or lose more weight. Furthermore, almost all patients reporting mental health issues as a barrier to transition, as they impacted on their ability to participate in and complete tasks, including self-care and social activities. Life-long weight issues were an added complexity</p> | <p>"I'd want to be put back to the clinic. I lost 20 kilos like that, and I gained it like that...and when that come up at Christmas time about them [the clinic] cutting us, you can ask any of the girls, I was hysterical. I was in tears" Keira Kingswood Focus Group</p> <p>"they [the clinic] had the oomph to say, yes, they'll keep up supported and all that sort of, but then over the time it just got slack" Rosebud Kingswood</p> <p>"I get back on the bike and I'm fine and I'm going along and all of a sudden something else has happened and I can't use it. I feel like I'm taking once step forward and two steps back" P1 Anna</p> <p>"liver issue doesn't help with not losing weight. And my pre-existing thyroid condition" P23 Mel</p> <p>"I'm kind of really neglecting myself. Not taking</p> |

|                                                                                                                                                                                                                                                                                                                                                                                                                                                                                                                                                                                                                      |                                                                                                                                                                                                                                                                                                                                                                                                                                                                                                                                                                                                                                                                                                                                                                                                                                                                                                                     |
|----------------------------------------------------------------------------------------------------------------------------------------------------------------------------------------------------------------------------------------------------------------------------------------------------------------------------------------------------------------------------------------------------------------------------------------------------------------------------------------------------------------------------------------------------------------------------------------------------------------------|---------------------------------------------------------------------------------------------------------------------------------------------------------------------------------------------------------------------------------------------------------------------------------------------------------------------------------------------------------------------------------------------------------------------------------------------------------------------------------------------------------------------------------------------------------------------------------------------------------------------------------------------------------------------------------------------------------------------------------------------------------------------------------------------------------------------------------------------------------------------------------------------------------------------|
| <p>around transition, given the ease of falling back into deep-rooted patterns of behaviour and lifestyle.</p>                                                                                                                                                                                                                                                                                                                                                                                                                                                                                                       | <p>care of myself some days. I don't clean anything. That's not me. And the more and more things start to build up in the home, the more I get stressed" P14 Jane</p> <p>"because you've got to understand that for most people, they've been living with this obesity for a long time. So, it's easy to go backwards" P3 Barry</p>                                                                                                                                                                                                                                                                                                                                                                                                                                                                                                                                                                                 |
| <p>Clinicians identified codependency as a significant barrier to transition, describing some patients as being overly 'needy', and being unwilling to transition to independence. Clinicians felt that these patients resisted transition by over relying on the clinic and clinicians, despite being in the process of transition, and expressed displeasure when support was weaned. Clinicians also found patient complexity level in terms of presence of comorbidities, mental health conditions, and social personal issues made a difficult transition more likely than in patients with low complexity.</p> | <p>"So I think a lot of people don't know who to go to for support and they hang on to us" C6 Cas FG2</p> <p>"they would still continue to ring the service every week or email or be in touch with clinicians on a weekly basis" C3 Ron FG1</p> <p>"became very reliant on each other and were very upset that we had to drop...to monthly, that didn't go down well!" C3 Ron FG1</p> <p>"someone who's got less of those complex issues that are sort of impacting on their experience, here, then you've actually got a little bit more wiggle room to manage with some of those other issues" C2 Pat FG1</p> <p>"So whereas when I think there's when there's a huge number of other chronic care issues, a lot of family disruption and social disruption limited skill levels in terms of engagement with the world, I think that would be sort of where things are a little less functioning" C2 Pat FG1</p> |

**Box 1**

|                                                                                                                                                                                                                                                                                                                                                                                                                                                                                                                                                                                                                                                                                                                                                                                                                                                                                                     |
|-----------------------------------------------------------------------------------------------------------------------------------------------------------------------------------------------------------------------------------------------------------------------------------------------------------------------------------------------------------------------------------------------------------------------------------------------------------------------------------------------------------------------------------------------------------------------------------------------------------------------------------------------------------------------------------------------------------------------------------------------------------------------------------------------------------------------------------------------------------------------------------------------------|
| <p><b>Guiding Principles for groups</b></p> <ul style="list-style-type: none"> <li>● <b>Educational</b> <ul style="list-style-type: none"> <li>○ Relevant educational topics</li> <li>○ Experienced/professional advice</li> <li>○ Counteract unsafe clinical advice</li> </ul> </li> <li>● <b>Flexible</b> <ul style="list-style-type: none"> <li>○ Allow input from attendees while maintaining group focus</li> <li>○ Collaboration in choosing topics</li> </ul> </li> <li>● <b>Sustainable</b> <ul style="list-style-type: none"> <li>○ Long term group support</li> <li>○ Support and training for facilitators</li> <li>○ Funding and resources: Training, equipment, venues, literature,</li> </ul> </li> <li>● <b>Cohesive</b> <ul style="list-style-type: none"> <li>○ Experienced facilitator to manage group dynamics</li> <li>○ Safe non-judgmental environment</li> </ul> </li> </ul> |
|-----------------------------------------------------------------------------------------------------------------------------------------------------------------------------------------------------------------------------------------------------------------------------------------------------------------------------------------------------------------------------------------------------------------------------------------------------------------------------------------------------------------------------------------------------------------------------------------------------------------------------------------------------------------------------------------------------------------------------------------------------------------------------------------------------------------------------------------------------------------------------------------------------|



o Positivity

**Table 4**

| <b>Bridging the gap to facilitate transition</b>                                                                                                                                                                                                                                                                                                                                                                                                                                                                                                                                                                                                                                                                                                                                                                                                                                                                                                                                                                                                                                                                                                                                                                                                                                                                                                                                                                                                                                                                                                                                                                                                                                                                                                                                                                                                                                                                                                                                                                                                                         |                                                                                                                                                                                                                                                                                                                                                                                                                                                                                                                                                                                                                                                                                                                                                                                                                                                                                                                                                                                                                                                                                                                                                                                                                                                                                                                                                                                                                                                                                                                                                                                                                                                                         |
|--------------------------------------------------------------------------------------------------------------------------------------------------------------------------------------------------------------------------------------------------------------------------------------------------------------------------------------------------------------------------------------------------------------------------------------------------------------------------------------------------------------------------------------------------------------------------------------------------------------------------------------------------------------------------------------------------------------------------------------------------------------------------------------------------------------------------------------------------------------------------------------------------------------------------------------------------------------------------------------------------------------------------------------------------------------------------------------------------------------------------------------------------------------------------------------------------------------------------------------------------------------------------------------------------------------------------------------------------------------------------------------------------------------------------------------------------------------------------------------------------------------------------------------------------------------------------------------------------------------------------------------------------------------------------------------------------------------------------------------------------------------------------------------------------------------------------------------------------------------------------------------------------------------------------------------------------------------------------------------------------------------------------------------------------------------------------|-------------------------------------------------------------------------------------------------------------------------------------------------------------------------------------------------------------------------------------------------------------------------------------------------------------------------------------------------------------------------------------------------------------------------------------------------------------------------------------------------------------------------------------------------------------------------------------------------------------------------------------------------------------------------------------------------------------------------------------------------------------------------------------------------------------------------------------------------------------------------------------------------------------------------------------------------------------------------------------------------------------------------------------------------------------------------------------------------------------------------------------------------------------------------------------------------------------------------------------------------------------------------------------------------------------------------------------------------------------------------------------------------------------------------------------------------------------------------------------------------------------------------------------------------------------------------------------------------------------------------------------------------------------------------|
| <b>Sub-themes</b>                                                                                                                                                                                                                                                                                                                                                                                                                                                                                                                                                                                                                                                                                                                                                                                                                                                                                                                                                                                                                                                                                                                                                                                                                                                                                                                                                                                                                                                                                                                                                                                                                                                                                                                                                                                                                                                                                                                                                                                                                                                        | <b>Excerpt</b>                                                                                                                                                                                                                                                                                                                                                                                                                                                                                                                                                                                                                                                                                                                                                                                                                                                                                                                                                                                                                                                                                                                                                                                                                                                                                                                                                                                                                                                                                                                                                                                                                                                          |
| <p><b>Community care: professional support and services</b></p> <p>Supportive community-based healthcare, such as allied health services, facilitated transition. Patients who felt supported described how having healthcare providers in the community who were aware of their issues, listened to them and provided help when needed was highly important to a successful transition. Healthcare providers described as being supportive included GPs, physiotherapists, dieticians, and psychologists. Correspondingly, feeling unsupported by healthcare providers was seen as detrimental to transition as they are an important source of professional input and support outside the clinic. Feeling unsupported stemmed from a perceived lack of communication and listening skills of the practitioner, which led patients to feel belittled by healthcare providers and viewed negatively because of their weight.</p> <p>During and after transition, when access to services available to patients of the clinic (e.g., psychologists, dieticians, physiotherapists) decreased or ceased altogether, patients described they still needed this support but had difficulties in access, primarily for financial reasons. Almost all patients stated that mental health support was essential beyond the clinic, with a need for extensive psychological support beyond the limited sessions partly covered by Medicare. Dietary support was also important, as patients felt ongoing help in creating diet plans and increasing food variety was necessary, however patients suggested this could be less formal and come in the form of 'quick reference' or daily/weekly meal suggestions. For physical activity, patients with mobility issues reported they needed physiotherapy support beyond the clinic, especially in the form of hydrotherapy, which was often difficult to access locally. Again, others reported less formal support was appropriate in the form of exercise guides and supported access to equipment and spaces such as gyms.</p> | <p>"I go to my GP when I need to or if I have any queries or concerns and she does support me. She listens to me, and she knows where I'm coming from" P22 Jess</p> <p>"you know even my physio, I do hydro with my physio every five to six weeks, even she said, you know, you're doing all the right things for your future health" P16 Jules</p> <p>"if you get an old style physician who just looks at the person in a negative way, that you're doing this to yourself, that kind of thing, that won't be beneficial" P3 Barry</p> <p>"the GPs don't really stop and listen to what...the patients saying, they just... "Here's some drugs. Now rack off," but if they would spend more time with them...that would help" P9 Evie</p> <p>"Definitely more psychological support, access to psychologists...the clinic offers limited...psychological services, but you really need more than that" P21 Kim</p> <p>"trying to get mental health services. I've been trying to do that. That's pretty much impossible" P20 Dom</p> <p>"I want somebody to come in with and plan a diet out with me, because I'm hopeless at diets" Keira Kingswood</p> <p>"the quick reference kind of thing, so if I just had a question about a particular product, there was some way I could message or look it up or something and find the information that I needed, whether I could eat it or not" P21 Kim</p> <p>"got exercises...which I find not that helpful, chiefly because I can't do a lot of the activities because it's all to do with the back" P1 Anna</p> <p>"I think if I do join a gym, then I might need some sort of specific support in that regard"</p> |

|                                                                                                                                                                                                                                                                                                                                                                                                                                                                                                                                                                                                                                                                                                                                                                                                                                                                                                                                                                                                                                                                                                                                                                                                                                                                                                                                                                                                                                                                                                                   |                                                                                                                                                                                                                                                                                                                                                                                                                                                                                                                                                                                                                                                                                                                                                                                                                                                                                                                                                                                                                                                           |
|-------------------------------------------------------------------------------------------------------------------------------------------------------------------------------------------------------------------------------------------------------------------------------------------------------------------------------------------------------------------------------------------------------------------------------------------------------------------------------------------------------------------------------------------------------------------------------------------------------------------------------------------------------------------------------------------------------------------------------------------------------------------------------------------------------------------------------------------------------------------------------------------------------------------------------------------------------------------------------------------------------------------------------------------------------------------------------------------------------------------------------------------------------------------------------------------------------------------------------------------------------------------------------------------------------------------------------------------------------------------------------------------------------------------------------------------------------------------------------------------------------------------|-----------------------------------------------------------------------------------------------------------------------------------------------------------------------------------------------------------------------------------------------------------------------------------------------------------------------------------------------------------------------------------------------------------------------------------------------------------------------------------------------------------------------------------------------------------------------------------------------------------------------------------------------------------------------------------------------------------------------------------------------------------------------------------------------------------------------------------------------------------------------------------------------------------------------------------------------------------------------------------------------------------------------------------------------------------|
| <p>Many patients had comorbid conditions and reported a need for long term management of these conditions. They also expressed a desire for more information/education opportunities regarding these conditions and how to specifically manage them in conjunction with obesity.</p> <p>Social work support needs were highly apparent among patients, which ranged from assistance with household tasks to financial assistance. Some patients specifically needed help accessing household assistance, including cleaning and food preparation services, due to mobility issues. Many patients needed help with financial assistance to help them access the full range of services needed to manage their conditions.</p>                                                                                                                                                                                                                                                                                                                                                                                                                                                                                                                                                                                                                                                                                                                                                                                      | <p>P20 Dom</p> <p>“Continued support with my managing my diabetes and help me losing more weight” P21 Kim</p> <p>“I’ve got a lot of anxiety about my mobility which I’m trying to deal with, and it’s still not possible with me to do those sorts of things” P2 Adrian</p> <p>“mobility and that I didn’t have a very good cleaning regime and someone to come in twice a week just to help me keep on top of things. That’s when they – I would like someone to say, “Okay, these services are available, there’s this one and it’s this much an hour” P1 Anna</p> <p>“cost is a big issue” P21 Kim</p>                                                                                                                                                                                                                                                                                                                                                                                                                                                 |
| <p>Clinicians also identified how important healthcare providers in the community were for successful transition, especially GPs who were familiar with their patients, though they did acknowledge that extended support from GPs may be difficult due to appointment time constraints. They also felt their patients often required longer term, integrated professional support, and that it was important to establish that support in the community. Clinicians also thought general practices could also provide additional support to patients (e.g., by providing informal group sessions). It was identified however, that many clinic patients do not have a regular GP. Clinicians also felt most patients needed psychological support as part of their community care, but were aware patients had difficulties accessing this.</p> <p>Need for social support/case coordination was also discussed by clinicians, who felt these services should be integrated with the clinic to bridge the gap between the clinic and community services, given the complexity of linking patients to multiple external services and support networks. They also felt more accessible financial support could address some of the issues faced by patients when accessing private therapy, as there was an insufficiency of funded therapy. Clinicians believed this integration should occur at the local health district (LHD) level with involvement of local councils to facilitate places to accommodate</p> | <p>“They have to work with their GP as well as a lot of it should be GP based” C6 Cas FG2</p> <p>“usually engaged a clinical psychologist in the community. They’ve got a good GP” C5 Kel FG2</p> <p>“If they’ve got a good GP, that’s going to be really important” C6 Cas FG2</p> <p>“it wasn’t really GPs because of time” C3 Ron FG1</p> <p>“they would still continue to ring the service every week or email or be in touch with clinicians on a weekly basis” C3 Ron FG1</p> <p>“staff anybody else within the GP practice. I don’t know if this practice nurses. Or other kind of healthcare assistants that could support patients in the drop in session” C3 Ron FG1</p> <p>“lot of people would benefit from having a psychologist. That’s where mental health and obviously this varies” C7 Pip FG2</p> <p>“It’s like it’s sort of something would say that it’s a holistic thing that needs to happen” C7 Pip FG2</p> <p>“someone that can kind of almost case coordinate that would be really good...something like kind of bridge that</p> |

|                                                                                                                                                                                                                                                                                                                                                                                                                                                                                                                                                                                                                                                                                                                                                                                                                                                                                                                                                                                                                                                                                                                                                                                                                                                                                                                                                                                                                                       |                                                                                                                                                                                                                                                                                                                                                                                                                                                                                                                                                                                                                                                                                                                                                                                                                                                                                                                                                                                                                                                                                                                                 |
|---------------------------------------------------------------------------------------------------------------------------------------------------------------------------------------------------------------------------------------------------------------------------------------------------------------------------------------------------------------------------------------------------------------------------------------------------------------------------------------------------------------------------------------------------------------------------------------------------------------------------------------------------------------------------------------------------------------------------------------------------------------------------------------------------------------------------------------------------------------------------------------------------------------------------------------------------------------------------------------------------------------------------------------------------------------------------------------------------------------------------------------------------------------------------------------------------------------------------------------------------------------------------------------------------------------------------------------------------------------------------------------------------------------------------------------|---------------------------------------------------------------------------------------------------------------------------------------------------------------------------------------------------------------------------------------------------------------------------------------------------------------------------------------------------------------------------------------------------------------------------------------------------------------------------------------------------------------------------------------------------------------------------------------------------------------------------------------------------------------------------------------------------------------------------------------------------------------------------------------------------------------------------------------------------------------------------------------------------------------------------------------------------------------------------------------------------------------------------------------------------------------------------------------------------------------------------------|
| <p>patients in the community (e.g., with bariatric chairs, transport, GP support, and community services such as community centres and gyms).</p>                                                                                                                                                                                                                                                                                                                                                                                                                                                                                                                                                                                                                                                                                                                                                                                                                                                                                                                                                                                                                                                                                                                                                                                                                                                                                     | <p>gap...That might be something that can kind of help that transition to other community supports” C4 Sam FG1</p> <p>“So I think there's a real gap in that. So a lot of people with obesity actually have disability. And can't access NDIS and I think that's a real travesty” C7 Pip FG2</p> <p>“many of our patients cannot afford a lot of private therapy. So when we're saying go and get mental health plans, there's always a gap of fifty or sixty dollars. And if you've got intense therapy to go through, that's a lot of money” C6 Cas FG2</p> <p>“I think councils could also support through physical spaces and admin, I think everyone kind of has to come to the party a bit” C7 Pip FG2</p>                                                                                                                                                                                                                                                                                                                                                                                                                |
| <p><b>Community support structures: support groups and their management</b></p> <p>Patients in our study expressed their need for support from family, friends, and peers with this appearing important in the transition process. Familial support came in the form of reminders, shared activities, and ‘being there’ for each other. Not having adequate support was described by patients as negatively impacting on their transition, as they felt that they were doing it on their own. Some patients reported receiving no help from their family, while others said they were actively isolated by family members, who were unsupportive in helping them connect with peers. Some patients said they are largely socially isolated and that being at the clinic gave them a chance to connect with peers that they otherwise would not have done. Patients described peers as those who have similar experiences, which facilitated both understanding and care. Patients felt peers understood their struggles and provided support in a non-judgmental way. As a result, leaving the clinic left some feeling of being disconnected, prompting them to start their own groups, as one of the reported primary benefits of groups was feeling supported by peers. Patients also felt that sometimes they just wanted extra one-on-one support that did not have to be professional. This support arose from shared lived</p> | <p>“to meet other people would be good, just to learn and interact” P2 Adrian</p> <p>“Well they do, well, three of us have had the gastric sleeve...so we all sort of deal with it together...we've all helped each other we've all supported each other... you know, listen to each other and just be there” P17 Tess</p> <p>“I guess, disadvantaging myself by just being alone at home” P14 Jane</p> <p>“when people ring up and want to talk to me and he says, “Oh, no, she's asleep.” I would love to talk to that person” Harriet Kingswood</p> <p>“someone that's been through and has come out the other side, has had similar experiences to you...succeeding, they know what they're doing, they roughly have been through the same thing you have, and they can help you” P1 Anna</p> <p>“but sometimes you just want to talk directly to a person privately” P14 Jane</p> <p>“if someone's in desperate need to discuss something, and sometimes if they need just to talk one-on-one...they need more support than what we're giving them at the moment. You can see that they're falling through the cracks”</p> |

|                                                                                                                                                                                                                                                                                                                                                                                                                                                                                                                                                                                                                                                                                                                                                                                                                                                                                                                                                                                                                                                                                                                                                                                                                                        |                                                                                                                                                                                                                                                                                                                                                                                                                                                                                                                                                                                                                                                                                                                                                                                                                                                                                                                                                                                                                                   |
|----------------------------------------------------------------------------------------------------------------------------------------------------------------------------------------------------------------------------------------------------------------------------------------------------------------------------------------------------------------------------------------------------------------------------------------------------------------------------------------------------------------------------------------------------------------------------------------------------------------------------------------------------------------------------------------------------------------------------------------------------------------------------------------------------------------------------------------------------------------------------------------------------------------------------------------------------------------------------------------------------------------------------------------------------------------------------------------------------------------------------------------------------------------------------------------------------------------------------------------|-----------------------------------------------------------------------------------------------------------------------------------------------------------------------------------------------------------------------------------------------------------------------------------------------------------------------------------------------------------------------------------------------------------------------------------------------------------------------------------------------------------------------------------------------------------------------------------------------------------------------------------------------------------------------------------------------------------------------------------------------------------------------------------------------------------------------------------------------------------------------------------------------------------------------------------------------------------------------------------------------------------------------------------|
| <p>experiences, leading to not feeling alone, especially during difficult times. Peer support also led to enhanced social connectedness, as some peers became friends, which was another motivator. Additionally, patients felt they were in a safe and non-judgmental environment with peer groups. Being in a group helped them to collectively cope with stigma issues, including public incidences of stigma and bullying due to their size, and enabled them to go to public places, whereas individually they would have been reluctant.</p> <p>Not all participants felt this way however, with others finding peers uninfluential in groups when participants did not bond with their peers. Other patients felt some group members negatively impacted on group dynamics, either by being pessimistic or derailing group activities by focussing on their personal issues, due to dominant or 'strong' personalities.</p> <p>Key barriers to attending groups was social anxiety, depression, and stigma, with some patients reporting it would be difficult for them to join or attend groups without having their anxiety adequately addressed. Some also felt larger groups were more likely to trigger this reaction.</p> | <p>P9 Evie</p> <p>"That we care. Everybody cares about what the other person's going through" P15 Sarah</p> <p>"because you can see they're other people just like you, you're not the only one. You're not the only one who's struggling, who wants to lose weight and you're not able to lose weight" P9 Fran</p> <p>"acceptance rather than stigmatised and put down sort of thing. Just knowing it's a safe place to talk and just learn from each other's experiences and make friends" P2 Adrian</p> <p>on my early stages just listening to other people's issues that didn't relate to me P14 Jane</p> <p>So, some people can be negative...There can be strong personalities, P3 Barry</p> <p>"it didn't take too many dominant personalities in a group for it to get a little bit too much" P20 Dom</p> <p>"I don't feel comfortable being in a support group... I'm not a very sociable person" P17 Tess</p> <p>"And also, I have social phobia and anxiety, so I kind of tend to avoid large gatherings" P21 Kim</p> |
| <p>Clinicians reiterated this need for social support, identifying that their patients are often isolated, with many having difficulties establishing and maintaining social support networks outside the clinic. Clinicians often tried to facilitate social support during group sessions, with some success</p> <p>They also felt this support should be consistent and long term where possible, as patients are unlikely to benefit from anything short term. Consistent with the participants, clinicians also felt peers could negatively impact on group dynamics with groups being 'dominated' by some personalities, resulting in benefit for only a few members. They felt this led to some patients feeling uncomfortable and therefore less likely to share their thoughts and feelings in group settings. Additionally, clinicians</p>                                                                                                                                                                                                                                                                                                                                                                                   | <p>"this group of people are often quite isolated" C3 Ron FG1</p> <p>"they're not people who are particularly great at reaching out and going to meet someone" C4 Sam FG1</p> <p>"engage, so your family, supports all of that, hey, you've actually done you've got a lot of those areas kind of that are helping" C2 Pat FG1</p> <p>"not one of our patients and I think there was 12 in that group, could list out a person that was supportive. So we said partner or parent or child or somebody who can help you to decipher what you know, what's going to help you. and not one of them could list out anybody and it was really sad" C6 Cas FG2</p>                                                                                                                                                                                                                                                                                                                                                                      |

|                                                                                                                                                                                                                                                                                                                                                                                                                                                                                                                                                                                                                                                                                                                                                                                                                                                                                                                                                                                                                                                                                                                                                                                                                                                                                   |                                                                                                                                                                                                                                                                                                                                                                                                                                                                                                                                                                                                                                                                                                                                                                                                                                                                                                                                                                                                                                                                                                                                                                                                                                                                                                                                                                                                                                                                                                                                                                                |
|-----------------------------------------------------------------------------------------------------------------------------------------------------------------------------------------------------------------------------------------------------------------------------------------------------------------------------------------------------------------------------------------------------------------------------------------------------------------------------------------------------------------------------------------------------------------------------------------------------------------------------------------------------------------------------------------------------------------------------------------------------------------------------------------------------------------------------------------------------------------------------------------------------------------------------------------------------------------------------------------------------------------------------------------------------------------------------------------------------------------------------------------------------------------------------------------------------------------------------------------------------------------------------------|--------------------------------------------------------------------------------------------------------------------------------------------------------------------------------------------------------------------------------------------------------------------------------------------------------------------------------------------------------------------------------------------------------------------------------------------------------------------------------------------------------------------------------------------------------------------------------------------------------------------------------------------------------------------------------------------------------------------------------------------------------------------------------------------------------------------------------------------------------------------------------------------------------------------------------------------------------------------------------------------------------------------------------------------------------------------------------------------------------------------------------------------------------------------------------------------------------------------------------------------------------------------------------------------------------------------------------------------------------------------------------------------------------------------------------------------------------------------------------------------------------------------------------------------------------------------------------|
| <p>reported that some members of peer-managed groups were unethically asking other members for money and had issue resolving disputes. The benefit of groups was also noted by clinicians, who agreed the greatest benefit of groups was the provision of social support, particularly for socially isolated patients. They felt groups could facilitate peer bonding, shared experiences, and comotivation in a comfortable and safe environment. They also described how groups allowed patients to participate together in activities that might otherwise have been too daunting to try, due to fear of stigmatisation. Additionally, clinicians reported that peers were able to help each other to establish and maintain community supports. Clinicians also believed fear was the greatest barrier to attending groups, with already isolated patients likely to find group attendance with people they do not know intimidating. They suggested patients be eased into groups by processes such as bringing a buddy to the first meeting. Clinicians also felt stigma was another major issue, reporting that patients holding bias and negativity towards groups of ‘people like them’ due to internalised stigma as barriers to participating in group activities.</p> | <p>“she hasn't got many contacts with friends and family support. But if she could connect with somebody” C3 Ron FG1</p> <p>“whatever support needs to be there, I, I believe it needs to be an ongoing and a at the time frame. Can't just be, you know, six, six months. That's an ongoing thing for their own support” C5 Kel FG2</p> <p>“It seemed like after a while it became something that was benefiting just a few people that were trying to keep it that way...To the detriment of others” C4 Sam FG1</p> <p>“They don't have to actually have that much self efficacy. They just need to be there for each other sort of thing, you know?” C7 Pip FG2</p> <p>“a safe, you know, confidential platform or program where people could actually meet other people in a similar situation” C3 Ron FG1</p> <p>“some of them have gone swimming together because they were afraid to go by themselves...They've gone together then it's you know, you're not going to poke fun at both of us” C6 Cas FG2</p> <p>“So to come into a group can be quite scary. So, obviously, there might be some you don't get because they won't come” C3 Ron FG1</p> <p>“potentially having people that meet with some of what we've run group and having a buddy you can bring in with you? To break the ice” C7 Pip FG2</p> <p>“And I think there's a lot of stigma attached to attending groups that are weight focused or weight management focus” C1 Mike FG1</p> <p>“They don't want to go and find a group like themselves...that would be a nightmare for them” C5 Kel FG2</p> |
| <p><b>Telehealth and online support: COVID-19 and beyond</b><br/>         Since the outbreak of COVID-19, telehealth was utilised to minimise disruptions to patient care. Telehealth was reportedly useful in maintaining</p>                                                                                                                                                                                                                                                                                                                                                                                                                                                                                                                                                                                                                                                                                                                                                                                                                                                                                                                                                                                                                                                    | <p>“Not a problem with that. Yeah. I feel about the same whether it's face to face or over the phone. Yeah. Just without the travel” P16 Jules</p> <p>“that's been pretty good. It's more convenient</p>                                                                                                                                                                                                                                                                                                                                                                                                                                                                                                                                                                                                                                                                                                                                                                                                                                                                                                                                                                                                                                                                                                                                                                                                                                                                                                                                                                       |

|                                                                                                                                                                                                                                                                                                                                                                                                                                                                                                                                                                                                                                                                                                                                                                                                                                                                                                                                                                                                                                                                                                               |                                                                                                                                                                                                                                                                                                                                                                                                                                                                                                                     |
|---------------------------------------------------------------------------------------------------------------------------------------------------------------------------------------------------------------------------------------------------------------------------------------------------------------------------------------------------------------------------------------------------------------------------------------------------------------------------------------------------------------------------------------------------------------------------------------------------------------------------------------------------------------------------------------------------------------------------------------------------------------------------------------------------------------------------------------------------------------------------------------------------------------------------------------------------------------------------------------------------------------------------------------------------------------------------------------------------------------|---------------------------------------------------------------------------------------------------------------------------------------------------------------------------------------------------------------------------------------------------------------------------------------------------------------------------------------------------------------------------------------------------------------------------------------------------------------------------------------------------------------------|
| <p>appointments with health providers, ensuring patients health was not neglected during this time. Most patients described telehealth as very convenient, especially as it saved time in terms of reduced travel. These patients also indicated that they would like opportunities for telehealth in the future, beyond COVID-19 restrictions.</p> <p>Some patients, despite acknowledging the benefits of telehealth, stated a preference for face-to-face appointments. This was largely due to technical issues, such as internet disruptions, and discomfort towards videoconferencing and feeling like they were less honest during telehealth.</p> <p>Additionally, support and information from online platforms was identified as useful during COVID-19, particularly the clinic Facebook page, which patients described as a useful way of receiving tips and other information, as well as staying connected with the clinic and their peers. Some patients also described that other closed groups on online platforms helped patients ‘vent’ feelings and connect to others while isolated.</p> | <p>for me because I live a little ways away from the clinic” P21 Kim</p> <p>“Unfortunately, the Internet around here isn't too good. So I had issues, technical issues with it” P20 Dom</p> <p>“I don't do the site, the actual face time, and that because I'm not comfortable in doing that so” P22 Jess</p> <p>“We’ve got a Facebook group where we can air things, like things that have happened, negative or positive. That’s been supportive” P3 Barry</p>                                                   |
| <p>Clinicians also reported the benefits of telehealth for keeping in contact with patients and providing support during transition. Additionally, clinicians maintained some support groups through a videoconferencing platform, and reported that patients were still able to bond through these sessions, though acknowledged that this was not as optimal as face-to-face sessions. Furthermore, clinicians commented that social networking platforms such as Facebook may be beneficial in giving patients a place to belong.</p>                                                                                                                                                                                                                                                                                                                                                                                                                                                                                                                                                                      | <p>“So they’re bonding on the group. Even on telehealth” C3 Ron FG1</p> <p>“It is it probably isn't as optimal as face to face. So I think of anybody, really. But I mean, the face to face is. Kind of important for a contestant because they're already online” C7 Pip FG2</p> <p>“even some social networking groups. So some Facebook or some sort of digital platform group that they that we know is accurate and useful that they can engage with and maybe that become their tribe as well” C6 Cas FG2</p> |

**Box 2**

|                                                                                                                                                                                                                                                                                                                                                                                                                                                                                                                                                                                                                                                                                                |
|------------------------------------------------------------------------------------------------------------------------------------------------------------------------------------------------------------------------------------------------------------------------------------------------------------------------------------------------------------------------------------------------------------------------------------------------------------------------------------------------------------------------------------------------------------------------------------------------------------------------------------------------------------------------------------------------|
| <p><b>Suggestions/recommendation for clinical practice</b></p> <ul style="list-style-type: none"> <li>• <b>Transition</b> <ul style="list-style-type: none"> <li>○ <b>Resistance to transition</b> <ul style="list-style-type: none"> <li>▪ Self-efficacy training</li> <li>▪ Psychological treatment for codependency (family therapy)</li> <li>▪ Clinician training to identify codependent patients/codependency in self</li> <li>▪ Transition readiness question/decision aids</li> </ul> </li> <li>○ <b>Facilitating transition</b> <ul style="list-style-type: none"> <li>▪ Semi-structured peer support groups with regular training of facilitators</li> </ul> </li> </ul> </li> </ul> |
|------------------------------------------------------------------------------------------------------------------------------------------------------------------------------------------------------------------------------------------------------------------------------------------------------------------------------------------------------------------------------------------------------------------------------------------------------------------------------------------------------------------------------------------------------------------------------------------------------------------------------------------------------------------------------------------------|

- Telehealth for longer follow up periods
- **Integration**
  - **Professional integration**
    - Telehealth system
    - GP training
  - **Social service support**
    - Social work and care coordination
